# Supplementary material for: Molecular and Phylogenetic Characterisation of a Highly Divergent Novel Parvovirus (Psittaciform Chaphamaparvovirus 2) in Australian Neophema Parrots
Source: MDPI journal article supplement (doi:10.3390/pathogens10121559), 2021-11-30
Supplement: s1 [file s1]

## Supplementary File

### **Molecular and phylogenetic characterisation of a highly divergent novel parvovirus (Psittaciform chaphamaparvovirus 2) in Australian *Neophema* parrots**

**Subir Sarker<sup>a\*</sup>**

<sup>a</sup> Department of Physiology, Anatomy and Microbiology, School of Life Sciences, La Trobe University, Bundoora, VIC 3086, Australia

**\* Author for correspondence:** Dr Subir Sarker, Department of Physiology, Anatomy and Microbiology, School of Life Sciences, La Trobe University, Bundoora, VIC 3086, Australia, email: s.sarker@latrobe.edu.au; phone: +61 3 9479 2317; fax: +61 3 9479 1222.

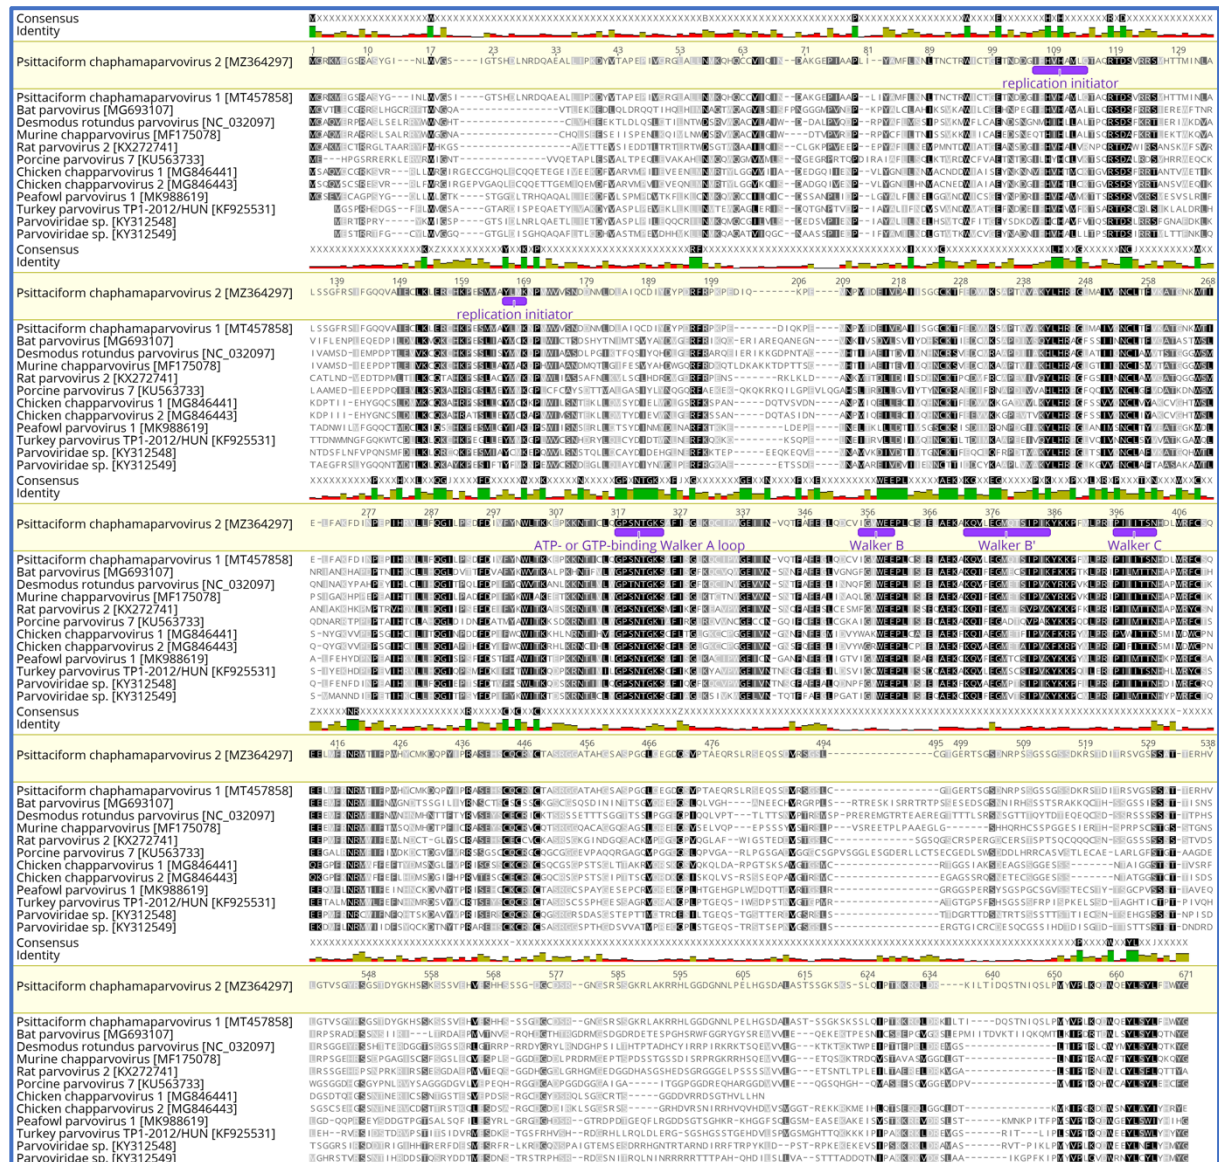

**Figure S1.** Alignment of the amino acid sequences of the complete NS1 gene under the genus *Chaphamaparvovirus* using MAFFT in Geneious (version 10.2.2) to show the genetic variation between Psittaciform chaphamaparvovirus 2 (PsChPV-2) and other selected parvoviruses. PsChPV-2 was highlighted with yellow background. The top graph represents the mean pairwise sequence identity over all pairs in the column (green: 100% identity; mustard:  $\geq 30\%$  and  $< 100\%$  identity; red:  $< 30\%$  identity).

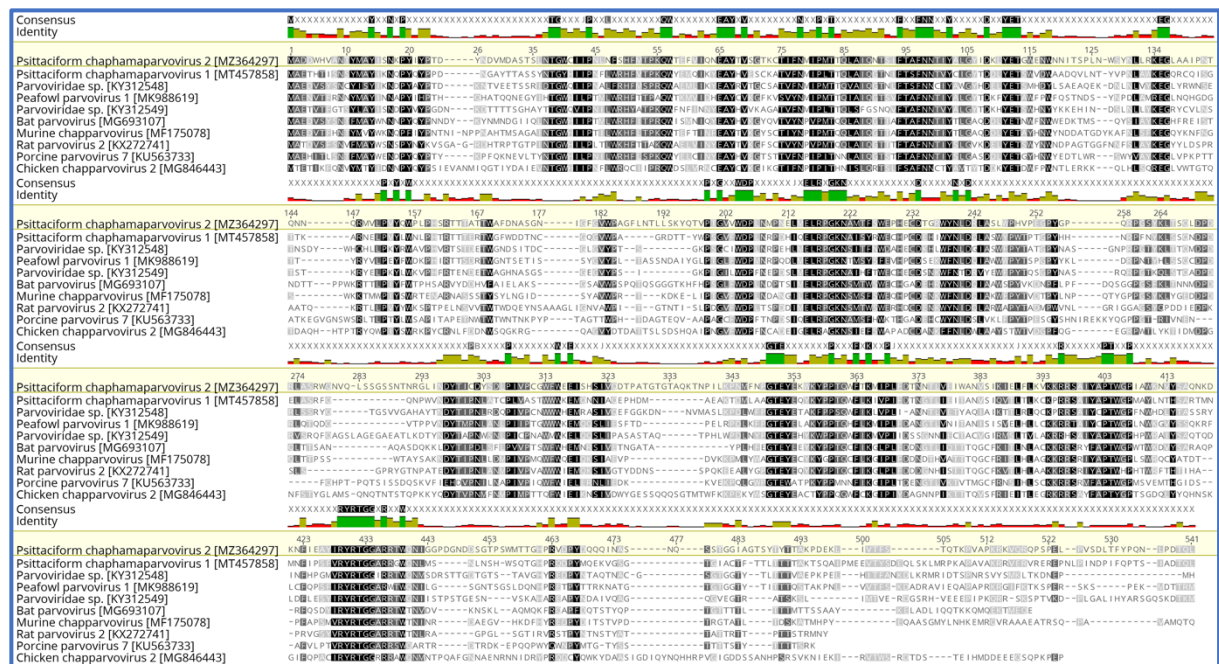

**Figure S2.** Alignment of the amino acid sequences of the complete VP1 gene under the genus *Chaphamaparvovirus* using MAFFT in Geneious (version 10.2.2) to show the genetic variation between Psittaciform chaphamaparvovirus 2 (PsChPV-2) and other selected parvoviruses. PsChPV-2 was highlighted with yellow background. The top graph represents the mean pairwise sequence identity over all pairs in the column (green: 100% identity; mustard:  $\geq 30\%$  and  $< 100\%$  identity; red:  $< 30\%$  identity).
